# Supplementary material for: Prevalence of TERT Promoter Mutations in Orbital Solitary Fibrous Tumors
Source: MDPI journal article supplement (doi:10.3390/cimb46020095), 2024-02-10
Supplement: s1 [file s1]

**Supplemental Table S1.** Extended results of representative histopathological changes in 9 samples. Some patients had multiple resections with different specimen. We analysed the relevant specimen with conventional histology and chose to present the most representative samples. Representative pictures of H&E staining are shown in Fig. 3.

\* HPF (high power-field)

| Patient N° | Growth pattern and cellular morphology                                                                                 | Cellularity | Diametre (mm)      | Necrosis | Vascularization | Staghorn vessels | Hyalinization | Resection status              | Number of mitotic figures per mm <sup>2</sup> (per 10 HPF*) | Risk for metastasis Demicco et al.[24] |
|------------|------------------------------------------------------------------------------------------------------------------------|-------------|--------------------|----------|-----------------|------------------|---------------|-------------------------------|-------------------------------------------------------------|----------------------------------------|
| A          | Patternless pattern 50% spindled cell, 50% epitheloid cell appearance, condensed chromatin,                            | +++         | 12                 | No       | +++             | yes              | -             | R0                            | <1, (1,5)                                                   | Low                                    |
| B          | Patternless pattern spindled cell, appearance, vesicular chromatin                                                     | ++          | 39                 | No       | ++              | no               | ++            | R1                            | <1, (1)                                                     | Low                                    |
| C          | Patternless pattern spindled cell, appearance, vesicular chromatin                                                     | ++          | Min. 50            | No       | +               | no               | +             | Not available for this sample | 3, (13)                                                     | Intermediate                           |
| D          | Storiform pattern spindled cell, appearance, vesicular chromatin,                                                      | ++          | 20                 | No       | +++             | yes              | -             | R1                            | <1, (3)                                                     | Low                                    |
| E          | Storiform pattern spindled cell, appearance, vesicular chromatin                                                       | +++         | 32                 | No       | ++              | Yes (mildly)     | +++           | R1                            | 0                                                           | Low                                    |
| F          | Patternless pattern spindled cell, appearance, condensed chromatin                                                     | +++         | Min. 35            | No       | +               | Yes (midly)      | +             | Not available for this sample | <1, (1)                                                     | Low                                    |
| G          | partially patternless pattern, (60%) partially storiform pattern (40%), spindled cell appearance, condensed chromatin, | +++         | Min. 20            | No       | +++             | yes              | No            | Not available for this sample | <1, (2)                                                     | Low                                    |
| H          | Patternless pattern, 50% spindled cell, 50% epitheloid cell appearance, condensed chromatin                            | ++          | Min. 180 (Pos 1-7) | No       | +               | no               | +++           | R1                            | <1, 3                                                       | Intermediate                           |
| I          | nested/insular-like growth pattern, mostly epitheloid appaerance (>90%), condensed chromatin                           | +           | Min. 13            | No       | +               | no               | +             | Not available for this sample | 5, (18)                                                     | Low                                    |

+ = weak positive staining in tumour cells

++ = moderate positive staining result in tumour cells

+++ = strong positive staining result in tumour cells

- = negative staining result in tumour cells.

**Supplemental Table S2.** Extended immunohistochemistry panel: For reasons of differential diagnosis an antibody panel was administered. All specimens were positive for CD34 and STAT6.

| Patient N° | CD34 | Bcl2 | CK MNF116 | CD31      | Vimentin | STAT6 | Ki-67 -Index (%) | CD99 | S100 | p53                  | p16 cytoplasmatic | p16 nuclear |
|------------|------|------|-----------|-----------|----------|-------|------------------|------|------|----------------------|-------------------|-------------|
| A          | +++  | +++  | -         | -         | ++       | ++    | 3                | +    | -    | ++, mutated pattern  | +                 | +++         |
| B          | +++  | ++   | -         | -         | -        | +     | 5                | +    | -    | ++, wildtype pattern | Focally +         | ++          |
| C          | +++  | +++  | -         | -         | +        | +++   | 20-25            | +    | -    | +, wildtype pattern  | ++                | +           |
| D          | +++  | +++  | -         | -         | +        | +++   | 1                | +    | +    | +, wildtype pattern  | ++                | +           |
| E          | +++  | +    | -         | -         | +        | +++   | 4                | +    | -    | +, wildtype pattern  | Focally +         | Focally ++  |
| F          | +++  | +++  | +         | -         | +        | +     | 6%               | ++   | -    | +, wildtype pattern  | ++                | -           |
| G          | +++  | +++  | -         | +         | +        | +++   | 15               | +    | -    | +, wildtype pattern  | ++                | ++          |
| H          | +++  | +++  | -         | Focally + | ++       | +     | 25               | +    | -    | +, wildtype pattern  | ++                | +++         |
| I          | +++  | +++  | Focally + | -         | ++       | +     | 20               | ++   | -    | +, mutated pattern   | ++                | ++          |

+ = weak positive staining in tumour cells

++ = moderate positive staining result in tumour cells

+++ = strong positive staining result in tumour cells

- = negative staining result in tumour cells.
